1 **Factors associated with utilization of preconception Sickle cell screening among women**  
2 **receiving antenatal care at Hoima regional referral hospital, Uganda.**

3 *Solomon Kyakuha<sup>1</sup>, Mbabazi G. Scovia<sup>1</sup>, Nathan Mugenyi<sup>2</sup>, Andrew Twineamatsiko<sup>3,4</sup>*

4 **Affiliation**

5 <sup>1</sup>School of Health Sciences, Uganda Martyrs University, Kampala, Uganda

6 <sup>2</sup>Faculty of Medicine, Mbarara University of Science and Technology, Mbarara, Uganda

7 <sup>3</sup>Seed Global Health, Uganda

8 <sup>4</sup>Brunel University London, UK

9    **Abstract**

10    **Introduction.** Globally, it is estimated that over 300,000 babies are born with Sickle cell disease  
11    annually, yet the uptake of preconception sickle cell screening services is at 25% among the total  
12    population that become pregnant every year. In Uganda, about 20,000 babies are born annually  
13    but with a low utilization rate of Pre-Conception Sickle cell screening services among women at  
14    11%. This study aimed at determining the utilization rate and factors associated with preconception  
15    sickle cell screening among pregnant women attending antenatal care at Hoima regional referral  
16    hospital, Uganda.

17    **Methodology.** A hospital-based cross-section study was done, systematic sampling used, and  
18    participants subjected to a semi-structured questionnaire. 334 participants were recruited, and data  
19    was collected, entered into Epidata, and analyzed using STATA version 14.

20    **Study findings.** The utilization rate of Pre-Conception Sickle cell screening services among  
21    women receiving Ante Natal Care was at 11.4%. There was a significant association between  
22    woman’s level of education, marital status, partners support and knowledge towards Pre-  
23    Conception Sickle cell screening services.

24    **Conclusions:** The utilization rate of Pre-Conception Sickle cell screening services is low with  
25    level of education, marital status, and having familial history of sickle cell disease, partner support  
26    and awareness being significant associated factors.

27    **Recommendation:** There is need to empower women to attain a formal education through adult  
28    literacy programs, massive sensitization and conducting regular health talks regarding Pre-  
29    Conception Sickle cell screening services.

- 30 **Keywords:** Preconception, Sickle cell disease (SCD), Sickle cell screening, Antenatal care
- 31 (ANC), Preconception sickle cell Screening.

## 32 **Introduction**

33 Sickle cell disease (SCD) is a parasol term for several abnormal hemoglobin molecules categorized  
34 by the presence of beta-globin gene mutations in which at least one of the point mutations leads to  
35 production of hemoglobin S. Sickle cell disease is associated with a variety of complications,  
36 which range from hemolytic anemia, chronic end organ damages and premature death. It's noted  
37 that in developed countries such as United States, about 95% of the children with sickle cell disease  
38 grow to adulthood that is above eighteen years compared to 84% in Uganda (1), thus resulting in  
39 affected adults with significant co-morbidities, complex medical complications. Important to note,  
40 there are a few sickles cell specialists in Uganda and most of these few are situated in the urban  
41 areas leaving the rural with no option but get care from none specialists, thus decreasing the quality  
42 of life of those children with the disease (1).

43 There is a rise in complications among those with SCD such as high death rates, and social and  
44 economic stress. Parents of children diagnosed with sickle cell disease suffer a lot of emotional  
45 distress and guilt in Africa. This is associated or attributed to low knowledge levels among parents,  
46 and they end up attributing the disease to socio-cultural, religious and economic scopes. To the  
47 worst extend, sickle cell disease has been thought to be a curse in the family thus causing a lot of  
48 stigma and expensive medical costs. This has left some families divorced leading to single  
49 parenthood (2).

50 Globally, it is estimated that over 300,000 babies are born with SCD, and majority of these cases  
51 arise from Sub Saharan Africa, Nigeria leading with a total of 150000 children. SCD is frequently  
52 lethal in the early life and is responsible for 70-80% killings of afflicted children before the 5th

53 year of age in sub-Saharan Africa. Sickle cell anemia is responsible for 20% of the annual  
54 childhood deaths among children with SCD in Uganda (3).

55 PCSCS is a technique carried out among partners (potential parents) before conception to screen  
56 a collection of hemoglobinopathies characterized by a 2- beta errors resulting in production of  
57 hemoglobin S. Failure to screen results in delivery of children with either sickle cell disease (SCD)  
58 or sickle cell traits (SCT) also known as carriers (4).

59 Counseling and hereditary screening services are present in many facilities and institutions in many  
60 cities of many countries; however, preconception and premarital screening and counseling of  
61 genetic disorders offered are limited.

62 Preconception counseling and testing have been thought about as one of the strategies to reduce  
63 sickle cell burden as evidenced in areas of high endemicity such as Cyprus and Sardinia.  
64 Preconception care is much understood by communities as a pre-pregnancy care and which is  
65 mostly considered for women, and this is misleading, and yet it should involve both male and  
66 female. Preconception care involves services other than preconception sickle cell screening such  
67 as family planning services, infertility information, HIV testing and treatment, hepatitis B testing  
68 and treatment and many others.

69 Preconception sickle cell screening provides several advantages with the key main ones being to  
70 determine whether the parents to be either carriers of genetic condition (SCD) and basing on results  
71 of the screening or testing expert counseling is done to the prospective parents to assist them in  
72 making informed decisions as they plan for becoming pregnant (Carrier Screening, 2018).

73 Research has shown that despite couples knowing their status, 88% of the tested couples will go  
74 on to bare children, but have an early intervention to have their children screened for SCD (6).

75 Globally efforts of primary prevention of sickle cell disease range from legal mandates of  
76 preconception hemoglobinopathy screening to public education and awareness. Previously  
77 preconception screening for SCD was thought to decrease the sickle cell burden majorly in areas  
78 where marriage was organized customary; however, changing cultural norms and preferences for  
79 marriage have hindered the success of the program in the current era (7).

80 Globally, it is estimated that the uptake of preconception sickle cell screening services is at 25%  
81 among the total population that become pregnant every year. This uptake is proven to decrease the  
82 burden of SCD among children by only 4%, thus if the uptake is increased beyond that, this will  
83 result in a more decrease in the burden (8). In sub Saharan Africa the uptake of PCSCS is estimated  
84 at 6% according to the study done at Paul Moukambi regional hospital Centre in koula-moutou,  
85 this is much lower compared to the uptake globally among child bearing age (9). In East Africa,  
86 many of the parents of children with sickle cell get to know their statuses after diagnosis of SCD  
87 among their children. There was an expression of participants to make preconception screening  
88 obligatory (10).

89 In 2018, the royal decree of Saudi Arabia mandated the preconception screening of beta  
90 thalassemia and SCD before drafting marriage. Studies done in the United States, Jamaica showed  
91 similar results that despite an increased knowledge on SCD, this doesn't affect the decision of  
92 marriage choice. In Saudi Arabia, of the 934 participants, it was noted that 88% of the participants  
93 with sickle cell trait still chose to marry each other. After knowing their status couple is well

94 prepared for the outcome in their children such as early diagnosis and treatment of sickle cell  
95 complications such as early initiation on folic acid and urea (11).

96 In another cross-sectional study done in south Saudi Arabia among women who had done  
97 preconception sickle cell screening and their partners, a total of 413 participants were subjected to  
98 online questionnaire and it was established that 66.8% of the participants had similar sickle cell  
99 status results, 67.8% were carriers for SCD and of the 413, only 46.5% had attended preconception  
100 counseling clinics, over 50% rejected the counseling after sickle cell testing. It was noted that  
101 18.2% of the participants had proceeded into marriage because they thought disease transmission  
102 to children was small and 5.2% proceeded because they thought that the lives of their children  
103 wouldn't be affected by disease. From the study it was noted that cultural, religious, and financial  
104 factors greatly affect the preconception sickle cell screening, with culture contributing about 48%  
105 (7).

106 In a study conducted among Dutch Moroccan and Turkish married women, it was noted that four  
107 key factors are associated with their perception towards preconception screening, these included  
108 the choice of their partners to have a sickle cell test done, the choice of marriage that is if one  
109 decides to marry from a population with high prevalence of sickle cell disease and choice of having  
110 a healthy child free of sickle cell disease. Other factors that influenced their perspective towards  
111 preconception sickle cell screening included their religious affiliations, culture, and gender (12).

112 In another study done in Benue state Nigeria, it assessed factors associated with awareness of  
113 hemoglobin statuses among pregnant women, these factors included age, type of occupation,  
114 education levels, level of income, reception of antenatal care, number of pregnancies, and distance  
115 from the health facility. From the study it was noted that younger participants had higher chances

116 of being aware of their status compared to older ones, comparing the unemployed, farmers were  
117 5.8 times lower odds whereas traders had 1.2 times higher odds of being aware of their statuses.  
118 The odds of mothers attending antenatal care was 2 times higher compared to those who didn't  
119 attend (13).

120 According to study done in Uganda by Ndeezi et al in 2016 to determine the prevalence of sickle  
121 cell trait and disease, samples were collected from 112 districts across the country, a total of 97,631  
122 results of the 99,243 samples were available. The overall children with sickle cell trait were 13.3%  
123 and those with disease were 0.7%. Different regions had different numbers of SCD and sickle cell  
124 trait (SCT). It was noted that SCD was 0.2% in southwestern and 1.5% in east central while SCT  
125 was 4.6% in southwestern (Kabale, Kisoro) and 19.8% in east central (Buikwe). The lowest  
126 prevalence of 3.0% was seen in two districts and eight districts had prevalence of above 20%, with  
127 the biggest being 23.9% in Alebtong (14).

128 In another study done in Luuka district to assess the readiness for implementation of preconception  
129 care in Uganda. Preconception care guidelines are well described in the maternal nutrition,  
130 adolescent and reproductive health policies. These guidelines have changed over time to include  
131 services such as hepatitis B screening, Rubella vaccination, management of health conditions such  
132 as hypertension, diabetes, and many others. It is noted in several studies that increasing knowledge  
133 and awareness are key in increasing preconception care services usage and attendance however  
134 there is an increased demand to disseminate preconception care packages in the district health  
135 system using best package and delivery channels. There are several barriers to preconception  
136 service utilization, such as low-income settings, Knowledge gap among mothers and low  
137 awareness levels (15).



138 In a study done at Mulago hospital among prim gravid mothers, its noted that despite 72.2% of  
139 mothers having positive attitude towards SCD screening, only 65.4% had adequate knowledge  
140 about preconception sickle cell screening, 49% knew it could be tested in blood.11% had screened  
141 for the disease before conception and about 66% supported the idea of making preconception  
142 screening mandatory (16).

143 Despite it being known that preconception sickle cell screening provides a key role in primary  
144 prevention and mothers having a positive attitude towards sickle cell screening and it being  
145 integrated into health care system, the uptake remains low. There is no study done in Hoima  
146 regional referral hospital to determine the uptake of preconception sickle cell screening and the  
147 associated factors despite having studies in Uganda, thus the study aims to establish the factors  
148 that are associated with the utilization of PCSCS among women of reproductive age.

## 149 **Methods and Materials**

### 150 **Study design.**

151 The study design was a cross-sectional study. Cross-sectional study design was used at one point  
152 in time and there was no follow up of participants after the study. It's a recommended measure of  
153 association and allowed several participants to be recruited at the same time.

### 154 **Study site.**

155 The study site was HRRH, located about 200km west of Kampala city. It had total bed capacity of  
156 360 beds and served as a regional hospital for eight districts namely, Hoima, Kakumiro, Kagadi,  
157 Kibaale, Buliisa, Masindi, Kiryandongo and Kikuube. The hospital runs both inpatient, and  
158 outpatient services. It provides both specialized and non-specialized health care services. The

159 hospital serves about 500,000 patients annually and 80 women for antenatal care services per day.  
160 This study was carried out at maternal and child health clinic, in the department of obstetrics and  
161 gynecology. Study was carried out at Hoima regional referral hospital because there were no  
162 similar studies carried out in the region and only available information was from central, western  
163 and eastern part of the country.

#### 164 **Study population.**

165 All pregnant women in their reproductive age 18 to 49 years, attended antenatal care at HRRH.

#### 166 **Sample population.**

167 The sample population included all pregnant women aged 18 to 49 years. Due to ethical  
168 considerations, those below 18 years were regarded as minors and couldn't independently consent  
169 to participate in the study.

#### 170 **Sampling frame:**

171 This included a list of all pregnant women aged 18 to 49 years who had registered to receive  
172 antenatal services at HRRH.

#### 173 **Sampling techniques**

174 Participants would be obtained using systematic probability sampling. This was to ensure that each  
175 mother had an equal chance to participate in the study (Saunders, Lewis, & Thornhill, 2003)

176

#### 177 **Sampling procedure**

178 Every fourth mother in the daily ANC register would be selected. The sampling interval was  
179 obtained by using the formula below.

180 Sampling interval =  $\frac{\text{Total expected population over the study period}}{\text{Total sample size}}$

181 Total sample size

182  $1400/346 = 4^{\text{th}}$

183 The first participant was obtained by simple random sampling (one of the first three participants)

184 to avoid bias.

185 **Table of variables**

186

| <b>Objective</b>                                                                     | <b>Variable</b>                                     | <b>Indicator</b>                                                                    | <b>Source of information</b>   | <b>Tools to be used</b>                    |
|--------------------------------------------------------------------------------------|-----------------------------------------------------|-------------------------------------------------------------------------------------|--------------------------------|--------------------------------------------|
| To determine the utilization rate of preconception sickle cell screening services    | Utilization of PCSCS                                | Utilization and non- utilization of PCSCS                                           | Women aged between 18-49 years | Interviews with structured questionnaires. |
| To determine the socio-demographic factors associated with preconception sickle cell | -Socio - demographic factors associated with PCSCS. | Age of mother, residence, occupation, Cultural origin, gravidity, religious origin, | Women aged between 18-49 years | Interviews with structured questionnaires  |

|                                                                                                      |                                                              |                                                                                                         |                                |                                           |
|------------------------------------------------------------------------------------------------------|--------------------------------------------------------------|---------------------------------------------------------------------------------------------------------|--------------------------------|-------------------------------------------|
| screening services                                                                                   |                                                              | marital status,<br>family history of SCD.<br><br>Knowledge and attitude, level of awareness.            |                                |                                           |
| To determine the socio-economic factors associated with preconception sickle cell screening services | Socio-economic factors associated with utilization of PCSCS. | Level of income, employment status, means/ cost of transport, family support.                           | Women aged between 18-49 years | Interviews with structured questionnaires |
| To determine the institutional factors associated with preconception sickle cell screening services  | Institutional factors associated with utilization of PCSCS.  | -availability, cost of PCSCS, facility/HW sensitization on PCSCS at ANC talks, Facility of previous ANC | Women aged between 18-49 years | Interviews with structured questionnaires |

|  |  |                             |  |  |
|--|--|-----------------------------|--|--|
|  |  | -health workers<br>attitude |  |  |
|--|--|-----------------------------|--|--|

187 **Data collection methods**

188 Data was collected using a face-to-face interview with open and close-ended questions about  
189 utilization of PCSCS services and its associated factors. This was used because it could easily  
190 provide the information needed from participants to measure PCSCS utilization, and it could cover  
191 a large number of respondents in the least time possible.

192 **Data collection tools**

193 A semi-structured questionnaire was used to collect information about utilization of PCSCS and  
194 the factors associated with its utilization. The questionnaire was administered by the researcher to  
195 the respondent by use of a face to face interview.

196 **Ethical considerations**

197 The study received ethical clearance from Uganda Martyrs University, Mild May Uganda  
198 Research Ethics Committee (MUREC) and HRRH research committee, since it involved highly  
199 sensitive information to be collected. Participants were not identified by their names or contacts  
200 or address to promote participant's privacy. For this study in particular, I also thought approval  
201 from Hoima RRH management to allow me carry out the study at the site.

202 **Data Analysis Plan**

203 Descriptive statistics was used to summarize continuous variables into mean and standard  
204 deviations or median and interquartile ranges, while frequencies and percentages will be used to

205 summarize categorical variables. A 95% confidence interval was used for utilization of PCSCS.  
206 Pearson's Chi square test was carried out to establish the factors associated with utilization of  
207 PCSCS services at a 5% level of significance using STATA version 14.

### 208 **Data quality control**

209 The research principle investigator trained three research assistants for two days on how to collect  
210 data. The research assistants double-checked all the questionnaires for completeness after the  
211 participants had finished responding to the questionnaire. The questionnaires were pretested using  
212 five participants before the study. All data entered into Epidata was to be password protected and  
213 backed up in Google drive and the questionnaires would be kept under lock and key drawers.

### 214 **Results**

215 Of the total estimated sample population (346 participants), the study only involved 333, the 11  
216 participants declined to participate, 10 participants withdrew from the participation during the  
217 interview process. This gave a 96% respondent rate. The study results were presented in  
218 accordance to the study objectives as follows:

### 219 **Utilization rate of preconception sickle cell screening services among women of reproductive** 220 **age**

221 In accordance to the utilization of preconception sickle cell screening services among the 334  
222 participants (women), the utilization rate of PCSCS was at 11.4%(38), 95%CI (8.0-14.8) of women  
223 aged 18-49 years that were receiving antenatal care from antenatal clinic of HRRH at the time of  
224 study and 88.6%(296),95% CI(85.2-92.0) had not utilized the preconception sickle cell screening  
225 services as illustrated in the figure 1 below.

226 **Figure 1. Shows a pie chart indicating the percentage of women aged between 18-49years who**  
 227 **had utilized PCSCS at HRRH**

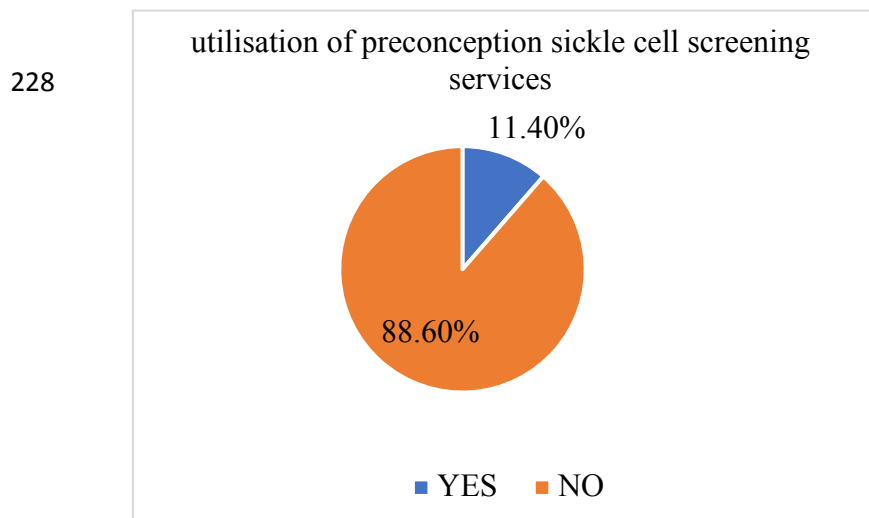

229 **Source-primary field data 2023**

230 **Socio-demographic characteristics of women 18-49 years receiving antenatal care from H**  
 231 **RRH**

232 Respondents who received antenatal care from Hoima regional referral during the study period  
 233 were asked about the age, marital status, place of residence, employment status, and history of  
 234 sickle cell disease, religious affiliations, and level of education, tribe and number of children.

235 **Table 2. Socio-demographic characteristics of the women aged 18-49years receiving ANC at**  
 236 **HRRH.**

| Variable (n=334)        | Frequency | Percentage |
|-------------------------|-----------|------------|
| <b>Age in years</b>     |           |            |
| 18-35                   | 328       | 98.7       |
| 36-49                   | 6         | 1.3        |
| <b>Marital Status *</b> |           |            |

|                          |     |      |
|--------------------------|-----|------|
| Married                  | 96  | 28.8 |
| Single                   | 92  | 27.6 |
| Cohabiting               | 141 | 42.3 |
| Widowed                  | 4   | 1.2  |
| <b>Education level*</b>  |     |      |
| Uneducated               | 10  | 3.0  |
| Primary                  | 99  | 29.7 |
| Secondary                | 165 | 49.6 |
| Diploma                  | 46  | 13.8 |
| Degree                   | 13  | 3.9  |
| <b>Employment status</b> |     |      |
| Yes                      | 216 | 64.7 |
| No                       | 118 | 35.3 |
| <b>Residence**</b>       |     |      |
| Urban                    | 223 | 69.3 |
| Rural                    | 76  | 23.6 |
| Both                     | 23  | 7.1  |
| <b>Religion</b>          |     |      |
| Catholic                 | 140 | 41.9 |
| Anglican                 | 127 | 38.0 |
| Pentecost                | 29  | 8.7  |
| Moslem                   | 29  | 8.7  |



|                        |     |      |
|------------------------|-----|------|
| Others                 | 9   | 2.7  |
| <b>Have children</b>   |     |      |
| Yes                    | 232 | 69.5 |
| No                     | 102 | 30.5 |
| <b>Tribe*</b>          |     |      |
| Munyoro                | 216 | 64.9 |
| Muganda                | 29  | 8.7  |
| Mukonjo                | 1   | 0.3  |
| Mukiga                 | 20  | 6.0  |
| Others                 | 67  | 20.1 |
| <b>SCD history</b>     |     |      |
| Yes                    | 5   | 15.3 |
| No                     | 283 | 84.7 |
| <b>Monthly income*</b> |     |      |
| Below 100,000          | 120 | 36.0 |
| 100000 to 1 Million    | 123 | 36.9 |
| Above 1 Million        | 6   | 1.8  |
| None                   | 84  | 25.2 |

237 Total number of participants was 334, \*total number of participants 333

238 \*\*total number of participants was 322

239 From the study, it was noted that respondents were distributed across all age groups with  
 240 majority of the participants were between ages of 18-35 years of age (98.7%) and the rest were  
 241 between 36-49 years (1.3%). Also majority of the respondents were cohabiting with their male

242 partners 141(42.3%), followed by those who were married 99(28.8%), singles 27.6(27.6%) and  
243 least by those who were widowed by the time of the study 4(1.2%).

244 Furthermore, it was found that 165(49.6%) of the respondents who participated in the study had  
245 completed secondary education, 99(29.7%) primary, 46(13.8%) tertiary (diploma),13(3.9%)  
246 university(degree), 10(3%) uneducated( no formal education). This implied that majority had  
247 completed secondary and only 3% had not attended any formal education.

248 For employment status, majority of the respondents were employed 216 (64.7%) and 118(35.3%)  
249 were unemployed while for area of residence, majority of the respondents were living in the urban  
250 areas 223(69.3%), followed by those in rural 76(23.6%) and minority of them were residing in  
251 both urban and rural areas 23(7.1%) at the time of the study or time when data was being collected.

252 The religious affiliations of the respondents were grouped into five major categories, catholic,  
253 Anglican, Pentecost, Muslim and others. Of the total number of respondents, majority were  
254 Catholics 140(41.9%), followed by Anglicans 127(38.0%), then Pentecost and Moslem with equal  
255 numbers 29(8.7%) and last others with 9(2.7%). The other religious affiliations included seventh  
256 day Adventist, faith of unity, earthiest and the non-believers.

257 It was noted that over 69.5 %( 232) of the respondents were already living with at least one child  
258 and more and about 102(30.5 %) were first time mothers (prime gravid) receiving antenatal care  
259 from HRRH during the period of data collection.

260 During the study, the tribal origin of the respondents was divided into five major tribes common  
261 in the study area that is Banyoro, Baganda, Bakonjo, Bakiga and others. It was found out that  
262 majority of the respondents were Banyoro 216(64.9%), other tribes (Batoro, Barulu, Basoga and  
263 many others) 67(20.1%), Baganda 29(8.7%), Bakiga 20(6%) and Bakonjo 1(0.3%).

264 Of the total number of respondents(334), it was found out that 51(15.3%) of them had a familial  
 265 history of sickle cell disease from either first or second degree relatives on either maternal or  
 266 paternal sides and majority of the respondents 283(84.7%) did not report any history of sickle cell  
 267 disease.

268 Finally, it was noted also that over 123(36.9%) were earning between 100,000 to 1million,  
 269 120(36%) were earning below 100000, 84(25.2%) were not earning anything and only 6(1.8%)  
 270 earned above 1 million every months. There were different sources of these earnings which  
 271 included, farming, small business enterprises such as saloons, poultry and salary from formal  
 272 employment such as nurses, teachers. Some women reported that some earnings were provided by  
 273 their husbands as stipend.

274 **Socio-demographic factors associated with PCSCS among women18-49 years receiving**  
 275 **ANC at HRRH.**

276 *Table 3: Bivariate analysis of Socio-demographic factors associated with PCSCS among*  
 277 *women18-49 years receiving ANC at HRRH.*

| Variable               | PCSCS Utilization |           | Chi-Square | P-value |
|------------------------|-------------------|-----------|------------|---------|
|                        | Yes n (%)         | No n (%)  |            |         |
| <b>Age</b>             |                   |           | 3.48       | 0.169   |
| 18-35                  | 37(11.9)          | 275(88.1) |            |         |
| 36-49                  | 1(4.8)            | 20(95.2)  |            |         |
| <b>Education level</b> |                   |           |            |         |
| Uneducated             | 0(0.0)            | 10(100)   | 3.64       | 0.484   |

|                          |          |           |             |               |
|--------------------------|----------|-----------|-------------|---------------|
| Primary                  | 10(10.1) | 89(89.9)  |             |               |
| Secondary                | 18(10.9) | 147(89.1) |             |               |
| Diploma                  | 6(13.3)  | 39(86.7)  |             |               |
| Degree                   | 3(23.1)  | 10(76.9)  |             |               |
| <b>Employment</b>        |          |           |             |               |
| <b>Status</b>            |          |           | 2.67        | 0.102         |
| Employed                 | 20(9.3)  | 195(90.7) |             |               |
| Unemployed               | 18(15.3) | 100(84.8) |             |               |
| <b>Marital status</b>    |          |           | 4.70        | 0.195         |
| Married                  | 16(16.8) | 79(83.2)  |             |               |
| Single                   | 8(8.7)   | 84(91.3)  |             |               |
| Cohabiting               | 13(9.2)  | 128(90.8) |             |               |
| Widowed                  | 0(0.0)   | 4(100)    |             |               |
| <b>Family History of</b> |          |           |             |               |
| <b>SCD</b>               |          |           | <b>8.75</b> | <b>0.003*</b> |
| Yes                      | 12(23.5) | 26(9.2)   |             |               |
| No                       | 39(76.5) | 256(90.8) |             |               |
| <b>Religion</b>          |          |           | 3.97        | 0.410         |
| Catholic                 | 14(10.0) | 126(90.0) |             |               |
| Anglican                 | 15(11.9) | 111(88.1) |             |               |
| Pentecost                | 3(10.3)  | 26(89.1)  |             |               |

|                  |          |           |      |       |
|------------------|----------|-----------|------|-------|
| Moslem           | 6(20.7)  | 23(79.3)  |      |       |
| others           | 4(0.0)   | 9(100)    |      |       |
| <b>Residence</b> |          |           | 1.19 | 0.551 |
| Urban            | 24(10.8) | 199(89.2) |      |       |
| Rural            | 7(9.3)   | 68(90.7)  |      |       |
| Both             | 4(17.4)  | 19(82.6)  |      |       |
| <b>Tribe</b>     |          |           | 0.95 | 0.917 |
| Banyoro          | 25(11.6) | 190(88.4) |      |       |
| Baganda          | 4(13.8)  | 25(86.2)  |      |       |
| Bakonjo          | 0(0.0)   | 1(100)    |      |       |
| Bakiga           | 3(15.0)  | 17(85.0)  |      |       |
| Others           | 6(9.0)   | 61(91.0)  |      |       |

278 *Source primary filed data 2023\* statistically significant at P<0.05*

279

280 From the table 2 above, several socio-demographic factors were analyzed for their relationship or  
 281 association with utilisation preconception sickle cell screening services among women 18-49 years  
 282 that were receiving antenatal care from Hoima regional referral hospital. These included age,  
 283 education level, employment status, residence, tribe, marital status, religion and history of sickle  
 284 cell.

285 History of SCD in the family, the utilization of PCSCS was highest among those who had no  
 286 familial history of SCD 39(76.5%) compared to those who had history of SCD 12(23.5%). And  
 287 for p-value of 0.035 less than 0.05, there was significant relationship between history of SCD and  
 288 utilization of PCSCS among women receiving ANC from HRRH.

289 Important to note, all the other socio-demographic factors had no significant association with  
 290 utilization of PCSCS among women receiving ANC from HRRH.

291 **Socio- economic factors associated with utilization of PCSCS among women receiving ANC**  
 292 **from HRRH.**

293 *Table 4: Bivariate analysis for Socio- economic factors associated with utilization of PCSCS*  
 294 *among women 18-49 years receiving ANC from HRRH.*

| Variable                     | PCSCS Utilization |           | Chi-Square   | P-value           |
|------------------------------|-------------------|-----------|--------------|-------------------|
|                              | Yes n (%)         | No n (%)  |              |                   |
| <b>Monthly income</b>        |                   |           | <b>31.19</b> | <b>&lt;0.001*</b> |
| Below 100,000                |                   |           |              |                   |
| 100,000 to                   | 12(10.0)          | 108(90.0) |              |                   |
| 1,000,000                    | 12(9.8)           | 110(90.2) |              |                   |
| Above 1,000,000              |                   |           |              |                   |
| None                         | 5(83.3)           | 1(16.7)   |              |                   |
|                              | 9(10.7)           | 75(89.3)  |              |                   |
| <b>PCSCS partner support</b> |                   |           |              |                   |
| Yes                          |                   |           | <b>88.83</b> | <b>&lt;0.001*</b> |
| No                           | 34(39.1)          | 53(60.9)  |              |                   |
|                              | 4(1.6)            | 241(98.4) |              |                   |

|                                    |           |           |              |                   |
|------------------------------------|-----------|-----------|--------------|-------------------|
| <b>Heard of PCSCS</b>              |           |           |              |                   |
| <b>Yes</b>                         |           |           | <b>69.73</b> | <b>&lt;0.001*</b> |
| <b>No</b>                          | 36(31.58) | 78(68.4)  |              |                   |
|                                    | 2(0.9)    | 217(90.1) |              |                   |
| <b>Cost of transport from HRRH</b> |           |           |              |                   |
| Less than 5k                       |           |           | <b>10.55</b> | <b>0.005*</b>     |
| Between 5k-10k                     | 24(9.0)   | 244(91.0) |              |                   |
| Above 10k                          | 9(19.2)   | 38(80.9)  |              |                   |
|                                    | 5(31.3)   | 11(68.8)  |              |                   |
| <b>Distance from Home</b>          |           |           |              |                   |
| Less than 1 km                     | 11(7.9)   | 129(92.1) | <b>6.11</b>  | <b>0.047*</b>     |
| Between 1 to 5km                   | 20(12.6)  | 139(87.4) |              |                   |
| Above 5km                          | 7(23.3)   | 23(76.7)  |              |                   |

295 **Source primary filed data 2023\* statistically significant at P<0.05**

296 For the women's monthly level of income, Utilization of PCSCS was a highest among those earned  
 297 above 1000000 5(83.3%), followed by those who didn't earn anything 9(10.7%), then those below  
 298 100000 12(10.0%) and least by those between 100000-1000000 12(9.8%). For P=0.001, there is  
 299 significant association between level of income of women 18-49 years and utilization of PCSCS.

300 Secondary, utilization of PCSCS was highest among women who had previously heard about  
 301 PCSCS from the different sources, that is media, health facility, churches 36(31.58%) compared

302 to those who had never heard about PCSCS 2(0.9%). For the P-0.001, there is a significant  
303 association between women having heard about PCSCS and utilization of PCSCS.

304 Thirdly, there was an increased utilization of PCSCS among partners who had partners support  
305 towards having PCSCS 34(39.1%) compared to those women who didn't have a partner's support  
306 4(1.6%). And the P-0.001, there was a significant association between male partner support and  
307 utilization of PCSCS among women aged 18-49 years.

308 For distance of women receiving ANC from HRRH, utilization of PCSCS was highest among  
309 those who travel above 5km 7(23.3%), followed by those who travel between 1-5km 20(12.6%)  
310 and least among those who travel for less than 1km 11(7.9%). And the p-0.047, there was  
311 significant relationship between distance from HRRH and utilization of PCSCS among women  
312 18-49 years receiving ANC from HRRH.

313 For cost of transport, utilization of PCSCS was highest among those who paid transport above  
314 10000 5(31.3%), followed by those whose cost of transport was between 5000-10000 9(19.2%)  
315 and least among those who paid transport less than 5000 24(9.0%). The P-0.05 significant  
316 relationship between cost of transport and utilization of PCSCS among women 18-49 years  
317 receiving ANC from HRRH

318 **Institutional factors associated with utilization of PCSCS among women 18-49 years**  
319 **receiving ANC from HRRH.**

320 ***Table 5: Bivariate analysis of Institutional factors associated with utilization of PCSCS among***  
321 ***women 18-49 years receiving ANC from HRRH.***



| Variable                                    | PCSCS Utilization |           | Chi-Square   | P-value           |
|---------------------------------------------|-------------------|-----------|--------------|-------------------|
|                                             | Yes n (%)         | No n (%)  |              |                   |
| <b>PCSCS talks</b>                          |                   |           | <b>79.87</b> | <b>&lt;0.001*</b> |
| Yes                                         | 36(34.6)          | 68(65.4)  |              |                   |
| No                                          | 2(0.9)            | 225(99.1) |              |                   |
| <b>PCSCS in Hoima</b>                       |                   |           | <b>47.01</b> | <b>&lt;0.001*</b> |
| Yes                                         |                   |           |              |                   |
| No                                          | 17(41.5)          | 24(58.5)  |              |                   |
| Don't know                                  | 8(19.5)           | 33(80.5)  |              |                   |
|                                             | 13(5.2)           | 235(94.8) |              |                   |
| <b>Heard PCSCS from Hoima</b>               |                   |           | <b>47.01</b> | <b>&lt;0.001*</b> |
| Yes                                         | 18(42.9)          | 24(57.1)  |              |                   |
| No                                          | 20(6.9)           | 271(93.1) |              |                   |
| <b>PCSCS in ANC</b>                         |                   |           | <b>76.97</b> | <b>&lt;0.001*</b> |
| Yes                                         |                   |           |              |                   |
| No                                          | 26(46.3)          | 29(53.7)  |              |                   |
|                                             | 13(4.7)           | 264(95.3) |              |                   |
| <b>Health worker attitude towards PCSCS</b> |                   |           | <b>11.23</b> | <b>0.011*</b>     |
| Poor                                        |                   |           |              |                   |

|                                    |          |           |      |       |
|------------------------------------|----------|-----------|------|-------|
| Good                               | 5(6.6)   | 71(93.5)  |      |       |
| Very good                          | 14(8.5)  | 151(91.5) |      |       |
| Excellent                          | 18(21.2) | 67(78.8)  |      |       |
|                                    | 1(14.3)  | 6(85.7)   |      |       |
| <b>Place where PCSCS was done.</b> |          |           |      |       |
| Private                            |          |           | 0.00 | 1.000 |
| Public                             | 15(75)   | 5(25)     |      |       |
|                                    | 3(75)    | 1(25)     |      |       |

322 *Source, primary field data 2023, \*significant at p<0.05*

323 From the study, it was noted that women who had talks about PCSCS from different sources, radio,  
 324 Television, church, health facilities or family members and friends utilized PCSCS 36(34.6%)  
 325 more than those that didn't have any talks in regards to PCSCS 2(0.9%). And for P- 0.001, there  
 326 was a significant relationship between PCSCS talks and utilization of PCSCS among women  
 327 receiving ANC from Hoima RRH.

328 Secondly, women who were aware of having PCSCS at Hoima RRH 17(41.5%), utilized PCSCS  
 329 more compared to those who didn't know 8(19.5%) and those who were not sure of the presence  
 330 of PCSCS at Hoima RRH 13(5.2%). For P- 0.037, there was significant relationship between  
 331 having PCSCS at Hoima RRH and utilization of the PCSCS among women attending ANC at  
 332 Hoima regional referral hospital.

333 Thirdly, women who had heard about preconception sickle cell screening from Hoima RRH  
 334 utilized PCSCS 18(42.9%) more than those who had never heard of it from Hoima RRH 20(6.9%).

335 Since P-value of 0.001, there was significant association between having heard preconception  
336 sickle cell screening and utilization of PCSCS among women receiving ANC from HRRH.

337 Women who were solely receiving ANC services from Hoima RRH utilized PCSCS 26(46.3%)  
338 more than those who were not solely receiving ANC from Hoima RRH. And for P- 0.001, there  
339 was a significant association between solely receiving ANC from Hoima RRH and utilization of  
340 PCSCS among women receiving ANC from Hoima RRH.

341 Lastly utilization of PCSCS was highest among those women who reported that the health workers  
342 attitude towards PCSCS was very good 18(21.2%), followed by those who reported the attitude  
343 was excellent 1(14.3%), those who reported being good 14(8.5%) and least among those who  
344 reported that the attitude was poor 5(6.6%). The P -0.011 there was a significant relationship  
345 between health workers attitude and utilisation of PCSCS among women receiving ANC from  
346 HRRH.

347

348

349 ***Table 6: Multivariate analysis of variables of women 18-49 years with significant association***  
350 ***with utilization of PCSCS***

351

352

353 **Multivariate analysis done using Modified Poisson regression**

| <b>Variable</b>                     | <b>Adjusted Prevalence ratio (aPR)</b> | <b>95% Confidence Interval</b> |       | <b>p-value</b> |
|-------------------------------------|----------------------------------------|--------------------------------|-------|----------------|
| <b>Education level</b>              |                                        |                                |       |                |
| Uneducated                          | 1                                      |                                |       |                |
| Primary                             | 1.026                                  | 0.975                          | 1.080 | 0.318          |
| Secondary                           | 1.071                                  | 1.025                          | 1.118 | 0.002          |
| Diploma                             | 1.162                                  | 1.046                          | 1.290 | 0.005          |
| Degree                              | 0.987                                  | 0.781                          | 1.246 | 0.912          |
| <b>Marital status</b>               |                                        |                                |       |                |
| Married                             | 1                                      |                                |       |                |
| Single                              | 1.082                                  | 0.989                          | 1.184 | 0.084          |
| Cohabiting                          | 1.092                                  | 1.009                          | 1.190 | 0.029          |
| Widowed                             | 1.170                                  | 0.972                          | 1.406 | 0.097          |
| <b>Heard of PCSCS</b>               |                                        |                                |       |                |
| Yes                                 | 0.883                                  | 0.801                          | 0.973 | 0.012          |
| No                                  | 1                                      |                                |       |                |
| <b>PCSCS during ANC</b>             |                                        |                                |       |                |
| Yes                                 | 0.668                                  | 0.524                          | 0.851 | 0.001          |
| No                                  | 1                                      |                                |       |                |
| <b>Supportive partner for PCSCS</b> |                                        |                                |       |                |
| Yes                                 | 0.706                                  | 0.619                          | 0.805 | <0.001         |
| No                                  | 1                                      |                                |       |                |

## 354 **Source-primary field data 2023**

355 \*-means significant at 5% level of significance

356 Women who completed secondary school had 7.1% higher Prevalence of utilizing PCSCS than  
357 those who were uneducated (aPR=1.071, 95%CI: 1.025-1.118, P-0.002), while those who had  
358 completed tertiary had 16.2% higher prevalence of utilizing PCSCS than those who were  
359 uneducated (aPR=1.162, 95%CI: 1.046-1.290, P-0.005). Women who were cohabiting had 9.2%  
360 higher prevalence of utilizing PCSCS than those who were married (aPR=1.092, 95%CI 1.009-  
361 1.190, P-0.029).

362 Secondly, women who had ever heard of PCSCS had a 11.7% lower prevalence of utilizing PCSCS  
363 than those who had never heard of PCSCS(aPR=0.668,95% CI:0.801-0.973,P-0.012) while those  
364 who attended ANC only from Hoima had a 33.2% reduced prevalence of utilizing PCSCS  
365 compared to those who also attended ANC from other facilities(aPR=0.668,95%CI: 0.524-  
366 0.851,P-0.001)

367 Lastly women who received Partners' support towards PCSCS had 29.4% reduced prevalence of  
368 utilizing PCSCS than those who didn't receive any support (aPR=0.706, 95%CI: 0.619 -0.805,P-  
369 0.001).

## 370 **Discussion**

371 The utilization rate of PCSCS among women attending ANC from Hoima regional referral hospital  
372 was found to be at 11.4%. This is not different from a similar study done in Mulago national  
373 referral hospital, located in the capital city, by Namukasa, 2015, that found the utilization rate of  
374 PCSCS at 11% among prim gravid mothers who were having their delivery services at the hospital.  
375 However the utilization rate is much lower compared to the global PCSCS utilization rate of 25%

376 according to study done by Modell 2008. The utilization rate noted at Hoima regional referral  
377 hospital is slightly lower compared to that carried out in Nigeria 14% according to studies done  
378 by (4).

379 The utilization rate of PCSCS among women 18-49 years was lower compared to sickle cell  
380 screening rate among women in their reproductive ages found in the communities of Lubaga  
381 division, in capital Kampala that found the sickle cell screening rate at 19.6% in a study conducted  
382 by (Tusuubira et al, 2018) and also much lower compared to sickle cell screening rate among care  
383 givers of sickle cell children that were admitted in a rural hospital in northern Uganda, St  
384 Ambrosoli that was found at 63.5% by Ocen 2022, and also among university students at 24.4%  
385 by study done by Kisakye et al,2022. The utilization rate of 11.4% despite it being low, it was a  
386 bit higher to study done in Gabon in 2021, which found the utilization rate at 6% among 275  
387 participants by study done by Mombo et al, 2021.

388 Therefore, the utilization of preconception sickle cell screening still remains low in both urban and  
389 rural settings as evidenced by the two studies in Hoima RRH, and Mulago national referral  
390 hospital.

391 Majority of respondents were aged between 18-35 years (98.7%), cohabiting women (42.3%),  
392 completed secondary education (49.6%) and 64% of the respondents were employed. Furthermore  
393 64.7% of the respondents were living in urban areas, catholic 41.9%, 69.5% of them already had  
394 at least one child and 64.9% were Banyoro by tribe, 15.3% had familial history of sickle cell  
395 disease and 36.9% were earning between 100000-1million shillings. This was in line with study  
396 carried in the community of Lussajja a sub-urban area in Kampala with only difference that it  
397 involved both sexes, with 61.8% being females, majority being in age groups of 19-28 years

398 61.8%, 52.9% in marriage and 62.7% had biological children. In this same study 56.7% already  
399 knew their sickle cell status at the time of the study.

400 Also these respondents' characteristics were similar to those of the participants for a study done in  
401 Mulago by Namukasa 2015, however it only considered only prim gravid mothers and of any age.  
402 The study differed from one done in Odisha by Bindhani et al, 2020 which included both male and  
403 female partners in the study, to determine the level of knowledge, attitude and utilization of  
404 preconception sickle cell screening. For a study done in Gabon by Mombo et al, 2021, 79% of the  
405 respondents who had preconception sickle cell screening were educated and were the age group of  
406 16-28 years, however the specific level of education not stated.

407 The utilization rate of PCSCS was highest among women aged 18-35 years 11.9%, and least  
408 among those aged 36-49years 4.8%.there was no association between age of a woman and  
409 utilization of PCSCS. This was not different from the studies done elsewhere for example in a  
410 cross sectional study done in Saudi Arabia, Jazan region, it was noted that age was significantly  
411 associated with utilization of preconception sickle cell screening services and utilization was  
412 highest among women aged 25-30 years and lowest among those aged above 45 years (7). This  
413 was explained by study done by Mombo et al, 2021 which stated that women of a young age are  
414 highly knowledgeable and show good attitude towards utilization of PCSCS among women.

415 There was significant association between level of education and utilization of PCSCS among  
416 women 18-49 years receiving ANC from HRRH ( aPR=1.071,95%CI:1.025-1.118,P-0.002), and  
417 the utilization was highest among those who had completed university education23.1%, then  
418 tertiary13.3%, then secondary 10.9% primary 10.1% and none among the uneducated group.  
419 However the findings varied with some studies for example in a study done in Muhimbili hospital  
420 Tanzania there was a link between level of education and utilization of PCSCS. Utilization was

421 highest among those who had completed secondary, then tertiary then university and there no  
422 direct relationship between level of education and utilization of PCSCS (Tusuubira et al., 2018.  
423 And this was not different from studies done in Oman by Alkalbani et al 2022a. this could however  
424 between noted by a review done by American society of hematology 2018, which reported that  
425 mothers level of education was independent of the mothers knowledge and awareness towards  
426 screening sickle cell in the preconception period.

427 There was no association between women employment status and utilization of PCSCS, however  
428 it was noted there was a higher utilization of PCSCS among the unemployed 15.3% compared to  
429 those who were employed 9.3%. These findings were different from those done before, for example  
430 study done in Mulago by Namukasa 2015, showed that mothers who were employed were more  
431 likely to have PCSCS done compared to those who are unemployed. The findings in Mulago were  
432 similar to those obtained by a study done in Benue city, Nigeria by Oluwole et al, 2022, that  
433 showed that unemployed women were 5.8 odds lower than employed women to utilize the PCSCS.  
434 This was explained by the availability of funds and easy access to both private and public facilities  
435 and easy access to commonly used media channels for PCSCS talks such as social media,  
436 televisions and radios. The reverse for Hoima could not be explained by this study and a further  
437 study on why it happened differently could be explained by a new study among the same  
438 population.

439 There was a significant association between marriage status and utilization of PCSCS among  
440 women receiving antenatal care from HRRH, at a 95% confidence interval during a multivariate  
441 analysis (aPR=1.092, 95%CI 1.009-1.190, P=0.029). The utilization of PCSCS was highest among  
442 those who were married 16.8%, cohabiting 9.2%, single 8.7% and none among the windows. This  
443 was due to the counseling sessions conducted among the partners in preparation for their marriage



444 vows, in which church leaders would encourage them to have a couple screened for several  
445 diseases such as HIV, Hepatitis B, and sickle cell among them. The findings were similar to studies  
446 done in Saudi Arabia in which there was an association between marriage and utilization of  
447 preconception sickle cell screening, from the study it was noted that preconception sickle cell  
448 screening was made mandatory for all customary marriages (7). In another survey done in the two  
449 villages of Karaput district of Odisha, it was noted that married couples had high chances of  
450 utilizing PCSCS than the unmarried because they are highly knowledgeable, aware and 60% of  
451 them believe that PCSCS can prevent SCD and the utilization rate was 29% compared to the  
452 general population globally (Bindhani et al. 2020). From this study despite married ones having  
453 knowledge and screening for sickle cell, it was noted that in about 75% of those who screened it  
454 didn't affect their choice of marriage. This was slightly lower to findings by the American society  
455 of hematology that found out that 88% of married who did the screening continued with their  
456 choices of marriage, but had early plans of having their children screened early to ascertain their  
457 sickle cell status.

458 For this study, there was no significant association between woman's religious beliefs and  
459 utilization of PCSCS among women receiving ANC from Hoima regional referral hospital at 95%  
460 confidence intervals. However it was not that utilization of PCSCS was highest among Moslem  
461 20.7%, followed by Anglicans 11.9%, then Pentecost 10.3%, catholic 10.0% and others by 0.0%.  
462 The findings were contrary to finds in study done in Cyrus and Sardinia, where preconception  
463 sickle cell screening was mandatory for all customary marriages and religion was considered one  
464 of the strategies to increase sensitization and knowledge of women about sickle cell disease  
465 (American Society of Hematology, 2018). Important to note, in Saudi Arabia despite making  
466 PCSCS mandatory for all the marriages, there was no evidenced reduction in SCD burden of the

467 country since many of the couples continued to engage in producing children despite their SCD  
468 results (7).

469 From the study, there was a significant association between familial history of sickle cell disease  
470 and utilization of preconception sickle cell screening. It was noted that mothers who had a history  
471 of sickle cell disease utilized PCSCS 76.5% while those with no history utilized PCSCS 23.5%.  
472 This could be explained by the increased awareness and burden attributed by the disease due to  
473 prior experience. This similar to a study done in Mulago hospital by Namukasa 2015, where history  
474 of SCD was associated with utilization of PCSCS, mothers who had more than children utilized  
475 PCSCS more than the prim gravid, this was because more of them 65.4% had past experience and  
476 knowledge (Ocen and Ohurira,2022).

477 There was no association between mothers' area of residence and utilization of PCSCS among  
478 mothers receiving ANC from HRRH, however it was noted that utilization was highest among  
479 those who resided in both areas 17.4%, then Urban 10.8% and least among the rural. This could  
480 be explained by the increased exposures to media talk shows in urban such as televisions, radios  
481 and availability of modern hospitals that provide PCSCS. This was not similar to study review by  
482 Osunkwo et al, 2021 in which areas of residence where highly associated with utilization of PCSCS  
483 among women and those in urban areas where more likely to have PCSCS done compared to those  
484 living in rural areas because of the closure distance to the facilities conducting the PCSCS services.

485 From the study there was no association between woman tribe and utilization of PCSCS, however  
486 the utilization of PCSCS was highest among Bakiga 15.0%, followed by Baganda 13.8%, then  
487 Banyoro 11.6%, others 9% and Bakonjo 0.0%. The findings were similar to study done among the  
488 caregivers of children with sickle cell who were receiving treatment from St Ambrosoli hospital,

489 in this study there was no association between sickle cell screening and tribe or culture of the  
490 mother.

491 From this study, woman's level of income was not associated with the utilization of PCSCS among  
492 women 18-49 years receiving antenatal care from Hoima regional referral. It was noted that  
493 however, that women who earned above 1000000 utilized PCSCS 83.3%. These were followed by  
494 those who didn't earn anything 10.7% and then those who earned below 100000 10.0% and least  
495 by those who earned between 100000-1000000. The findings were contrary to a study done in  
496 the city of Lagos where woman level of income was associated with utilization of PCSCS among  
497 women in which those of a higher level of earning were more likely to utilize PCSCS compared  
498 to those of a lower level of earning. It was noted from the study that those of higher level, class 4  
499 utilized PCSCS at rate of 49% (Oluwole et al, 2022). This was because the level 4 income mothers  
500 had funds to access the screening at both public and private facilities. This wasn't noticed in the  
501 study at Hoima RRH, it was noted that those didn't earn anything utilized PCSCS more than those  
502 who earned between 100000-1000000.

503 Mothers' prior knowledge and awareness of PCSCS was significantly associated with utilization  
504 of PCSCS, and it was noted that mothers who were highly knowledgeable and aware of PCSCS  
505 utilized the screening 31.58% compared to those who were not aware of PCSCS 0.9%. The findings  
506 were supported by the fact that the more one becomes aware and knowledgeable about the burden  
507 and associated complications the more one is likely to carry out the screening to allow early SCD  
508 screening and initiation on treatment incase couple decides to bare children. The findings were  
509 similar to those of a study done in Mulago hospital by Namukasa ,2015, that showed a positive  
510 association between mothers level of knowledge , awareness and utilization of preconception  
511 sickle cell screening services, from the study in Mulago, of the 11% who utilized PCSCS, 98% of

512 them were much aware about the disease and 94% had a good understanding of the sickle cell  
513 disease and these findings were in agreement with the findings in a study done among care givers  
514 of children with sickle cell disease admitted in a hospital and from a community survey on sickle  
515 cell screening (Tusuubira et al, 2018). However this was not similar to study done in Nigeria that  
516 showed no significant relationship between mothers' knowledge about PCSCS and its utilization.  
517 This was explained by despite mothers being knowledgeable, their choice to utilize PCSCS was  
518 highly affected by their attitude (17).

519 There was a significant association between partner support towards PCSCS and utilization among  
520 women receiving ANC from HRRH. It was noted from the study that those women who had  
521 support of their partners utilized PCSCS (39.1%) while those who didn't receive support utilized  
522 PCSCS (1.9%). This is due because in cases where a male partner supports the female in ensuring  
523 the safety of the future child is well, women are more likely to comply and have the screening  
524 done since there is no associated resistance from the co –partner. This support can even be  
525 monetary to aid in paying for the test or even transport to reach the screening sites. The findings  
526 were to a study done in Tanzania, where there was a positive support of parents towards  
527 preconception sickle cell screening, thus providing support to ensure screening is done thus  
528 preventing seeing their children suffer with the burden related to sickle cell (Kisanga *et al.*, 2021).

529 From the study there was no significant association between distance traveled by mothers to  
530 HRRH and utilization of PCSCS. It was noted that utilization of PCSCS was highest among  
531 women who travelled distance above 5km 23.3%, travelled by those who travelled 1-5km 12.6%  
532 and least among those who travelled less than 1km 7.9% for ANC to HRRH. This was similar to  
533 study done among women who were caregivers of children admitted on wards at St Ambrosoli,

534 there was no relationship between distance from the facility and utilization of sickle cell screening  
535 and testing services at the facility.

536 From the study, there was no significant association between cost or means of transport incurred  
537 or used by mothers to reach the facility. It was noted that utilization of PCSCS was highest among  
538 women who incurred costs above 10000 31.3%, followed by between 5000 -10000 19.2% and  
539 least among those who incurred less than 5000 9%. Majority of women travelled by Boda Boda  
540 about 89%, about 12% walked to the hospital and the rest used other modes of transport. This was  
541 similar to study done by Oluwole et al, 2022, the study didn't find any association between means  
542 of transport or duration of travel to facility and utilization of PCSCS among women (Oluwole, et  
543 al, 2022).

544 From the study, there was a significant association between health talks about PCSCS among  
545 women 18-49 years receiving ANC from HRRH and utilization of PCSCS. The PCSCS was higher  
546 among those who had received health talks about PCSCS 34.6% than those who never attended  
547 these talks 0.9%. Mothers received talks from different sources such as radios, televisions, church  
548 counseling's, family members and friends and also from health facilities.

549 The findings were similar to study conducted to assess knowledge, awareness and attitude towards  
550 sickle cell trait screening among university students in Uganda, conducted by (18). This was also  
551 similar to studies done in Saudi Arabia (7).

552 Additionally making PCSCS part of the ANC package talks to mothers showed a significant  
553 association with utilization of PCSCS, in same study it was noted that 46.3% had PCSCS during  
554 ANC. This was important to those that had missed during the prior preconception period and would

555 utilize the service on the next preconception period or even plan to have their sickle cell test done  
556 during pregnancy to aid early childhood screening, diagnosis and treatment.

557 Availability of PCSCS was significant to its utilization among women receiving ANC from  
558 HRRH. Utilization of PCSCS was highest among mothers who were aware of the availability of  
559 PCSCS 41.5%, followed by those who didn't know it was available 19.5% and then least among  
560 those who were not sure of its availability 5.2%. This was because mere knowing the service is  
561 available aided mothers in seeking for it compared to those who didn't know or were not sure if  
562 it's really available at Hoima RRH.

563 Findings were similar to those of a study carried out in Oman among 400 university students in  
564 which the availability of PCSCS increased its utilization rate and therefore was a significant  
565 relationship between availability of PCSCS and its utilization (Alkalbani et al., 2022).

566 In a cross sectional study carried out among 400 university students in Oman, despite these  
567 students being highly knowledgeable and aware of the availability of preconception SCD. Also  
568 these findings were similar to those in Uganda in a study carried out in Luuka district among  
569 women in their adolescent and reproductive age (15). However, these study findings were different  
570 to those in study done in the city of Lagos, Nigeria in which availability of preconception sickle  
571 screening services had no significant relationship with the utilization of services (Oluwole et al,  
572 2022). These could have been affected by other factors such as cost of the service and women  
573 attitude in having the test done.

574 From the study done, there was no significant relationship between health workers attitude towards  
575 PCSCS and utilization of PCSCS among women 18-49 years receiving ANC from Hoima regional  
576 referral hospital. It was noted that utilization was high among women who reported the health

577 workers attitude being very good 21.2%, followed by those who reported the attitude being  
578 excellent 14.3%, then good 8.55% and least among those who reported the attitude being poor  
579 6.6%. This is contrary to what is expected as seen in a study done among caregivers where the  
580 health care workers attitude in having parents screened resulted in more caregivers screening for  
581 sickle cell disease.

582 From this study, there was no significant association between the cost of PCSCS and utilization of  
583 PCSCS among women attending ANC from HRRH. It is noted that the utilization of PCSCS was  
584 the same in both private and public health facilities at 75%. This contrary to study done by  
585 Alkalbani et al 2022b, to assess the willingness to undertake preconception sickle cell screening  
586 among women and in this study the cost of PCSCS was significantly associated with the utilization  
587 of PCSCS (19).

## 588 **Conclusion**

589 The utilization rate of preconception sickle cell screening among women receiving ANC from  
590 Hoima regional referral hospital was low (11.4%). From the study, it was noted that the utilisation  
591 of PCSCS was significantly associated with woman's level of education, marital status and support  
592 from partner towards PCSCS.

## 593 **Limitations to the study**

594 There was a possibility of recall bias because women might not have been able to remember if  
595 they tested before conception, since it could have happened some time back and since laboratory  
596 evidence was not checked to a certain evidence of the screening, participants would more like  
597 reply depending on their desirability. This affected the internal validity of the study. In order to  
598 minimize this error, PCSCS was considered for that current pregnancy.

599 Participants declined to participate because topic was sensitive.

600 The study did not involve interviewing of both male and female and the information regarding  
601 male screening was obtained from their wives and the institutional related factors would have also  
602 been better understood by involving health workers as participants into the study.

603

604 Lastly, utilisation of PCSCS was also interfered with woman's awareness of PCSCS and attending  
605 antenatal care only from HRRH.

### 606 **Recommendations**

607 At individual level, local leaders need to empower women to attain a formal education through  
608 adult literacy program since a few of the participants were highly educated, majority had  
609 completed primary and secondary education.

610 At community level, DHOs office should ensure information in regard to PCSCS is translated into  
611 the native local languages. There is need for massive sensitization in community to enhance  
612 PCSCS knowledge on its benefits and also encourage women to attend ANC services through the  
613 VHTs.

614 At hospital level (HRRH), there is need by health workers to conduct regular health talks to women  
615 to enhance their level of knowledge and awareness and also ensuring the PCSCS is readily  
616 available.



617 **CRedit authorship contribution statement**

618 Solomon Kyakuha<sup>1</sup>, Andrew Twineamatsiko<sup>1\*</sup>: Project administration, Supervision, Investigation,  
619 Methodology & implementation.

620 Nathan Mugenyi<sup>2</sup>: Manuscript Writing – original draft, Writing – review & editing

621 **Declaration of competing interest**

622 The authors declare that they have no known competing financial interests or personal  
623 relationships that could have appeared to influence the work reported in this paper.

624 **Acknowledgments**

625 None

626 **Funding**

627 None

628

629

630

631

632

633

634

635

636 **REFERENCES**

- 637 1. MOH U. An up-date on the prevalence of sickle cell trait in Eastern and Western Uganda |  
638 Central Public Health Laboratories [Internet]. 2014 [cited 2023 Apr 2]. Available from:  
639 <https://www.cphl.go.ug/node/134>
- 640 2. Egesa WI, Nakalema G, Waibi WM, Turyasiima M, Amuje E, Kiconco G, et al. Sickle Cell  
641 Disease in Children and Adolescents: A Review of the Historical, Clinical, and Public Health  
642 Perspective of Sub-Saharan Africa and Beyond. *International Journal of Pediatrics*. 2022 Oct  
643 8;2022:e3885979.
- 644 3. Implementation of a Sickle Cell Disease Screening Initiative in Uganda with  
645 HemoTypeSCTM | Blood | American Society of Hematology [Internet]. [cited 2022 Sep 11].  
646 Available from: [https://ashpublications.org/blood/article/132/Supplement%201/LBA-](https://ashpublications.org/blood/article/132/Supplement%201/LBA-3/375110/Implementation-of-a-Sickle-Cell-Disease-Screening)  
647 [3/375110/Implementation-of-a-Sickle-Cell-Disease-Screening](https://ashpublications.org/blood/article/132/Supplement%201/LBA-3/375110/Implementation-of-a-Sickle-Cell-Disease-Screening)
- 648 4. Oluwole EO, Adeyemo TA. Knowledge, Attitude and Willingness to Screen Younger Infants  
649 for Sickle Cell Disease among Mothers attending Immunization Clinic in an Urban  
650 Community in Lagos, Nigeria. *Journal of Community Medicine and Primary Health Care*.  
651 2021 Aug 20;33(2):52–67.
- 652 5. Genes Australia [Internet]. [cited 2022 Sep 4]. Carrier Screening. Available from:  
653 <https://www.genesaustralia.com.au/services/preconception-carrier-screening/>
- 654 6. Pecker LH, Lanzkron S. Sickle Cell Disease. *Ann Intern Med*. 2021 Jan 19;174(1):ITC1–16.

- 655 7. Gosadi IM, Gohal GA, Dalak AE, Alnami AA, Aljabri NA, Zurayyir AJ. <p>Assessment of  
656 Factors Associated with the Effectiveness of Premarital Screening for Hemoglobinopathies  
657 in the South of Saudi Arabia</p>. IJGM. 2021 Jun 30;14:3079–86.
- 658 8. Modell B. Global epidemiology of haemoglobin disorders and derived service indicators.  
659 Bull World Health Organ. 2008 Jun 1;2008(6):480–7.
- 660 9. Mombo LE, Makosso LK, Bisseye C, Mbacky K, Setchell JM, Edou A. Acceptability of  
661 neonatal sickle cell disease screening among parturient women at the Paul Moukambi  
662 Regional Hospital in rural Eastern Gabon, Central Africa. African Journal of Reproductive  
663 Health. 2021 Oct 14;25(3):72–7.
- 664 10. Kisanga E, Mutagonda R, Myemba DT, Njiro BJ, Simon F, Marealle AI, et al. Premarital  
665 genetic screening and care of Tanzanian children with sickle cell disease: a qualitative study  
666 on parents' views and experiences. J Community Genet. 2021 Oct 1;12(4):515–23.
- 667 11. Pecker LH, Naik RP. The current state of sickle cell trait: implications for reproductive and  
668 genetic counseling. Blood. 2018 Nov 29;132(22):2331–8.
- 669 12. Verdonk P, Metselaar S, Storms O, Bartels E. Reproductive choices: a qualitative study of  
670 Dutch Moroccan and Turkish consanguineously married women's perspectives on  
671 preconception carrier screening. BMC Womens Health. 2018 May 31;18(1):79.
- 672 13. Ezenwosu OU, Itanyi IU, Nnodu OE, Ogidi AG, Mgbeahurike F, Ezeanolue EE. Community  
673 based screening for sickle haemoglobin among pregnant women in Benue State, Nigeria: I-  
674 Care-to-Know, a Healthy Beginning Initiative. BMC Pregnancy and Childbirth. 2021 Jul  
675 8;21(1):498.

- 676 14. Ndeezi G, Kiyaga C, Hernandez AG, Munube D, Howard TA, Ssewanyana I, et al. Burden  
677 of sickle cell trait and disease in the Uganda Sickle Surveillance Study (US3): a cross-  
678 sectional study. *The Lancet Global Health*. 2016 Mar;4(3):e195–200.
- 679 15. Nathan I, Nyabigambo A, Kayego A, Waiswa P, Moley K, Walani S. Readiness for  
680 implementation of preconception care in Uganda; a review on the current policy, health  
681 system barriers, opportunities and way forward. *IPCB*. 2021 May 26;7(3):68–72.
- 682 16. Namukasa S. Knowledge, attitudes and utilization of premarital sickle cell disease screening  
683 among primigravida mothers at mulago hospital [Internet] [Thesis]. Makerere University;  
684 2015 [cited 2022 Jul 22]. Available from: <http://makir.mak.ac.ug/handle/10570/7836>
- 685 17. Oluwole EO, Okoye CD, Ogunyemi AO, Olowoselu OF, Oyedeji OA. Knowledge, attitude  
686 and premarital screening practices for sickle cell disease among young unmarried adults in  
687 an urban community in Lagos, Nigeria. *Pan Afr Med J* [Internet]. 2022 [cited 2023 Apr  
688 27];42. Available from: <https://www.panafrican-med-journal.com/content/article/42/8/full>
- 689 18. Kisakye E, Gavamukulya Y, Barugahare BJ. Sickle cell trait screening in students in a  
690 Ugandan university: a cross-sectional study. *Journal of International Medical Research*  
691 [Internet]. 2022 Nov 23 [cited 2023 Apr 26]; Available from:  
692 <https://journals.sagepub.com/doi/10.1177/03000605221138491>
- 693 19. Alkalbani A, Alharrasi M, Achura S, Al Badi A, Al Rumhi A, Alqassabi K, et al. Factors  
694 Affecting the Willingness to Undertake Premarital Screening Test Among Prospective  
695 Marital Individuals. *SAGE Open Nursing*. 2022 Jan 1;8:23779608221078156.

696
